# Supplementary material
Source: PubMed Central journal article supplement (PMC3169830)
Supplement: mmc1.pdf [file mmc1.pdf]

Supplemental Data

**Homozygous Mutations in *PXDN*  
Cause Congenital Cataract, Corneal Opacity,  
and Developmental Glaucoma**

Kamron Khan, Adam Rudkin, David A. Parry, Kathryn P. Burdon, Martin McKibbin, Clare V. Logan, Zakia I.A. Abdelhamed, James S. Muecke, Narcis Fernandez-Fuentes, Kate J. Laurie, Mike Shires, Rhys Fogarty, Ian M. Carr, James A. Poulter, Joanne E. Morgan, Moin D. Mohamed, Hussain Jafri, Yasmin Raashid, Ngy Meng, Horm Piseth, Carmel Toomes, Robert J. Casson, Graham R. Taylor, Michael Hammerton, Eamonn Sheridan, Colin A. Johnson, Chris F. Inglehearn, Jamie E. Craig, and Manir Ali

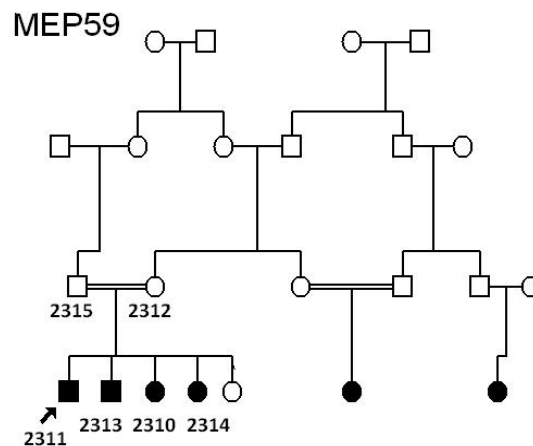

| Marker  | Physical distance (Mb) | MEP59    |          |            |          |          |            | LOD SCORE |
|---------|------------------------|----------|----------|------------|----------|----------|------------|-----------|
|         |                        | 2310     | 2311     | 2312       | 2313     | 2314     | 2315       |           |
|         |                        | Affected | Affected | Unaffected | Affected | Affected | Unaffected |           |
| D2S2268 | 0.2                    | 218 218  | 218 218  | 218 218    | 218 218  | 218 218  | 218 218    | 2.10      |
| D2S323  | 2.1                    | 189 189  | 189 189  | 189 189    | 189 189  | 189 189  | 187 189    | 2.31      |
| D2S2245 | 2.8                    | 172 172  | 172 172  | 168 172    | 172 172  | 172 172  | 172 172    | 1.74      |
| D2S319  | 3.4                    | 119 119  | 119 127  | 119 119    | 119 119  | 119 119  | 119 127    | -2.84     |
| D20S103 | 0.6                    | 97 99    | 93 95    | 93 99      | 93 95    | 97 99    | 95 97      | -10.73    |
| D20S193 | 3.3                    | 149 153  | 151 153  | 149 151    | 145 151  | 149 153  | 145 153    | -10.73    |
| D20S482 | 4.5                    | 153 161  | 153 153  | 153 161    | 153 157  | 153 161  | 153 157    | -9.56     |
| D20S895 | 5.1                    | 214 222  | 214 216  | 216 222    | 216 216  | 214 216  | 214 216    | -8.73     |

**Figure S1. Homozygosity Mapping in Family MEP59**

Microsatellite genotyping data for chromosomes 2p and 20p are shown. The physical distance for each marker is based on the human February 2009 assembly (hg19) of the UCSC Genome Browser. Allele sizes are shown in base pairs. Note that the chromosome 2p region is homozygous in each of the affected members (highlighted in grey). A maximum multipoint LOD score of 2.31 was calculated at D2S323 using the SUPERLINK program with 0.001 mutant allele frequency and 100% penetrance under a recessive model.

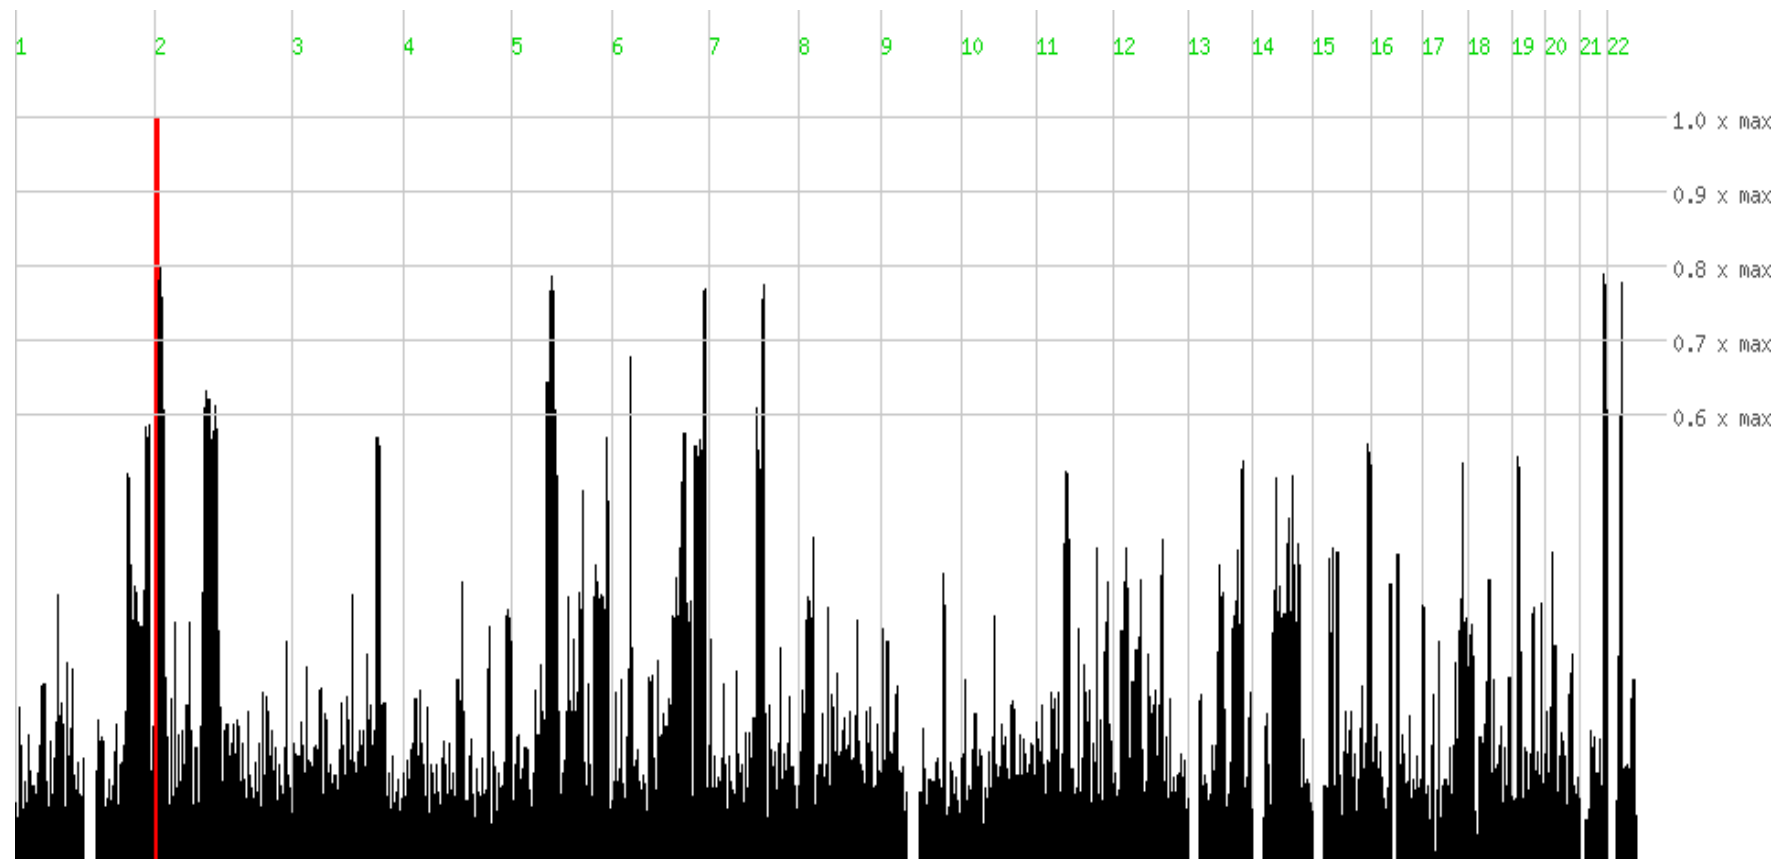

**Figure S2. Homozygosity Mapping in Family CA2**

Genomic DNA from each of the four affected individuals was genotyped on HumanHap610 Quad Arrays (Illumina, San Diego, CA, USA) at the Australian Genome Research Facility, Melbourne, Australia, according to standard protocols. Homozygosity Mapper output highlighted a single significant peak indicated in red at the p telomere of chromosome 2 that was common to the four affected individuals in this family.

**Table S1. Summary of Output following Targeted Capture and Next Generation Sequencing for MEP60 (and the 7 Unrelated DNAs)**

| CHROM | POS     | REF | MEP60 | QUAL    | DNA1  | DNA2  | DNA3 | DNA4 | DNA5 | DNA6 | DNA7  | Gene         | Function            | cDNA       | Protein  |
|-------|---------|-----|-------|---------|-------|-------|------|------|------|------|-------|--------------|---------------------|------------|----------|
| chr2  | 1652983 | AG  | A     | 1299.31 | AG    | AG    | AG   | AG   | AG   | AG   | AG    | PXDN         | frameshift deletion | c.2568delC | p.P856fs |
| chr20 | 2413163 | G   | C     | 2232.61 | G     | G     | G    | G    | G    | G    | G     | TGM6         | nonsynonymous SNV   | c.1995G>C  | p.R665S  |
| chr20 | 1902349 | A   | A/G   | 260.23  | A/G   | A     | A    | A    | A    | A    | A     | SIRPA        | nonsynonymous SNV   | c.745A>G   | p.T249A  |
| chr20 | 3766941 | T   | T/G   | 268.7   | T/G   | T     | T    | T/G  | T/G  | T    | T/G   | CENPB        | nonsynonymous SNV   | c.190A>C   | p.T64P   |
| chr20 | 5454332 | T   | T/C   | 275.65  | T     | T     | T/C  | T/C  | T/C  | T/C  | T/C   | LOC643406    | nonsynonymous SNV   | c.44T>C    | p.L15P   |
| chr20 | 1552348 | GGT | G     | 1831.27 | GGT/G | GGT   | GGT  | GGT  | GGT  | GGT  | GGT   | SIRPB1       | intronic            | -          | -        |
| chr20 | 5548208 | TAA | T     | 987.5   | T     | TAA/T | T    | TAA  | TAA  | T    | TAA/T | RP5-1022P6.2 | intronic            | -          | -        |

The variants remaining after filtering against dbSNP131 are summarised. The chromosome (CHROM), position from the top of the chromosome in bp (POS), reference sequence at this position (REF), MEP60 sequence at this position (MEP60), quality of the sequence variant at this position (QUAL), the sequence at this position for the 7 unrelated DNAs (DNA1-7), Gene ID, function of the variant, cDNA and protein sequence nomenclature for the variation are depicted.

**Table S2. Human *PXDN* Oligonucleotide Primers**

| Exon | Primer Sequence (F)      | Primer Sequence (R)     | Product Size (bp) |
|------|--------------------------|-------------------------|-------------------|
| 1    | AGTCTCGAGCGCAGAATCAG     | TCCCGGATCTCCACGAAG      | 557               |
| 2    | AGCAAATGTGTAGCGATGTTG    | CCACTGATTGTGGATGATGAG   | 230               |
| 3    | TGTCAATGTGACCTTTTCCAAG   | ACAATAATTCATAAGCAGCACG  | 265               |
| 4    | CTTTTCCGTCTGAAGTTTGACC   | CATGCAAACAGCTAGCTCACTC  | 230               |
| 5    | AATTTGGGCAAAAATCTGGA     | GAATGGAAAGGCAAGGAACA    | 176               |
| 6    | CCATTTCTTTTGTTTTCAGATTCA | AGAGAGAAAAGAAGGCTTTGCAG | 277               |
| 7    | GCTCAGATTCACCACGAGAC     | CACTCACCACAGTTCAGCTCTT  | 334               |
| 8    | TCTGTGGTTTCCTTTTGGAC     | GTGTGGTTTGGGTGTCTGAG    | 289               |
| 9    | ATGGGTGAGGTACGTCTTTGTG   | ATTCTTATTTTGGGGTGCAAGG  | 323               |
| 10   | AAAACCATGTCAAACCGGGA     | GACAGGGCAGAAGATTCTATGG  | 436               |
| 11   | GACTGTGGTCATTTTCTTGGTC   | AGTGGAAATGTGTGCTTCCTG   | 267               |
| 12   | TCTGTGGTCATGCTGTCAGTC    | GTAACACTAATGTCAGCTGCGG  | 327               |
| 13   | GGCAGGGGATTTTGTTCCTC     | CCAGCCCGTCTACCTTGTATC   | 246               |
| 14   | CCCCAACCTAGGTCAGATAAC    | CTGGGACCACACTAGGGACC    | 306               |
| 15   | GTATGCCTTGTGGCTAATGATG   | TTTAATCACTCCCACCTTCACC  | 275               |
| 16   | AATAGCAATGATTATATTTTGGGG | AATGTGACTTAACTGAGGCGTG  | 322               |
| 17A  | ATTGAGTGCGTCTTGCTTTTCT   | CATCAGCATGTGGGTGAACT    | 386               |
| 17B  | GTGTACGAGAATGGCTTCAACA   | GGTACACGGAGTTCATGAGCAG  | 388               |
| 17C  | GCTGCTCATGAACTCCGTGT     | GCGTGTGCATGCTGGTCAGG    | 296               |
| 17D  | CGAGAACGAGAGCCCCATCC     | CGTCCAGCCGGTAAAGCAGT    | 371               |
| 17E  | ATCAATGCTGGCATCTTCAAC    | CCTAGGTACACGAGCCATCC    | 481               |
| 18   | CACGTGCAGCTTTGTTAGGTAG   | AGTCTCAACCAGGACAGCTCTT  | 269               |
| 19   | TAGTGACCTGTGAGTCTCCTGC   | TGACATCTGCAGGTCATTAAGC  | 354               |
| 20   | TGGCAGGATGTGCTTAATTTT    | CAGGATGCCGGTCCTACTGC    | 273               |
| 21   | CGTGACCTGCCAAGGTTATATT   | ACAGTTGCCTGGGAATAAAAATG | 285               |
| 22   | CTTTTAATACAAGAGCCAAGCTG  | ACATGGGACTCTCGGACTTG    | 244               |
| 23   | AGCTGACAGGCTTTGCTCAC     | AGTTCTGGGTGTTTCCTGGTC   | 291               |

Primer pairs used for the amplification of the coding region and splice site junctions of human *PXDN*.
